# Supplementary material for: Highly crystalline anatase TiO2 nanocuboids as an efficient photocatalyst for hydrogen generation
Source: Royal Society of Chemistry journal article supplement (doi:10.1039/d0ra10750f), 2021-01-01
Supplement: d0ra10750f1.pdf [file d0ra10750f1.pdf]

## Electronic Supplementary information

### Highly crystalline anatase TiO<sub>2</sub> nanocuboids as an efficient photocatalyst for hydrogen generation

Shubhangi R. Damkale, Sudhir S. Arbuj, Govind G. Umarji,

Sunit B. Rane and Bharat B. Kale\*

Centre for Materials for Electronics Technology (C-MET), Off Pashan Road, Panchawati, Pune-411008, Maharashtra, India. E-mail:bbkale1@gmail.com,bbkale@cmet.gov

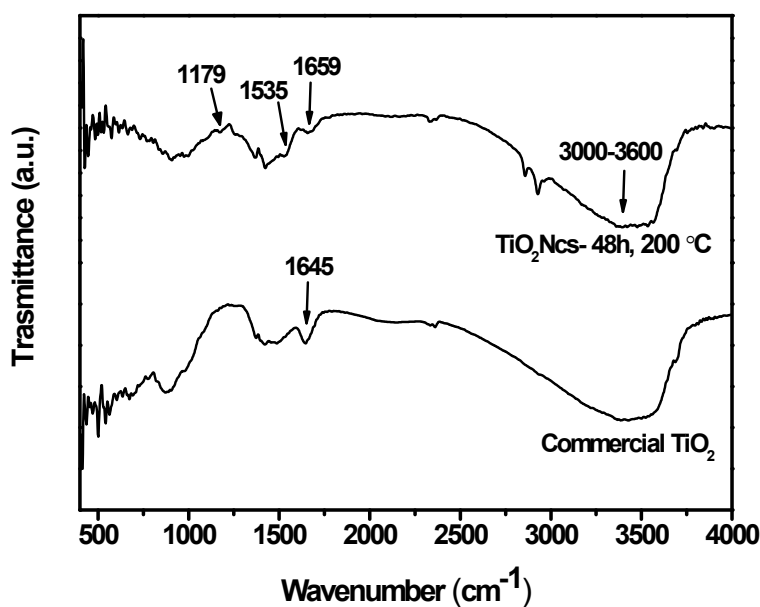

**Figure S1.** FTIR spectra of commercial TiO<sub>2</sub> and TiO<sub>2</sub> nanocuboids prepared at 200 °C for 48 h

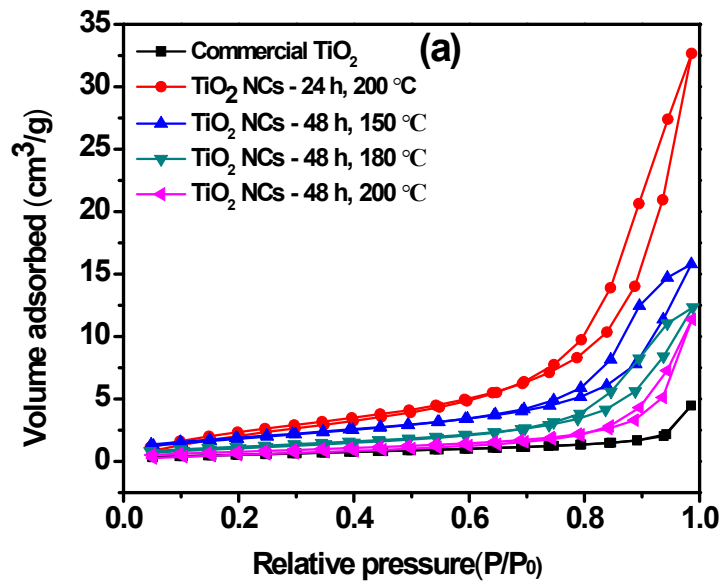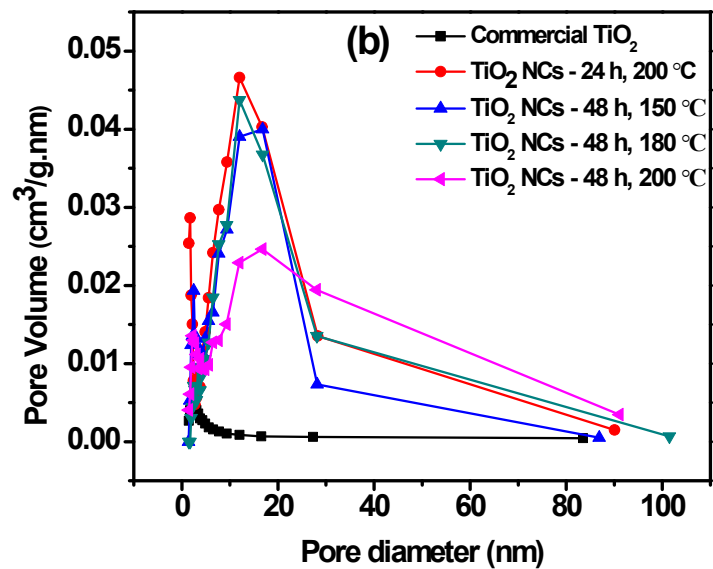

**Figure S2.** (a)  $N_2$  adsorption-desorption isotherms and (b) corresponding pore size distribution curves of commercial  $TiO_2$  and as prepared  $TiO_2$  nanocuboids

**Possible reactions involved in the formation of TiO<sub>2</sub> nanocuboids**

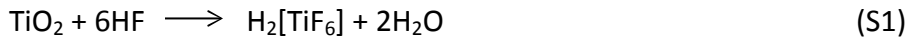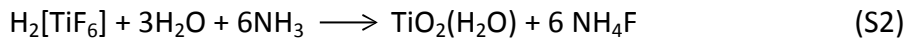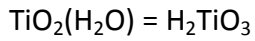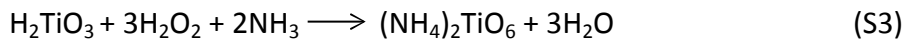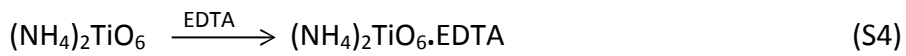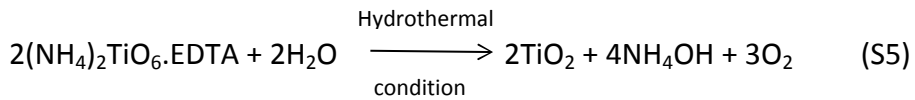

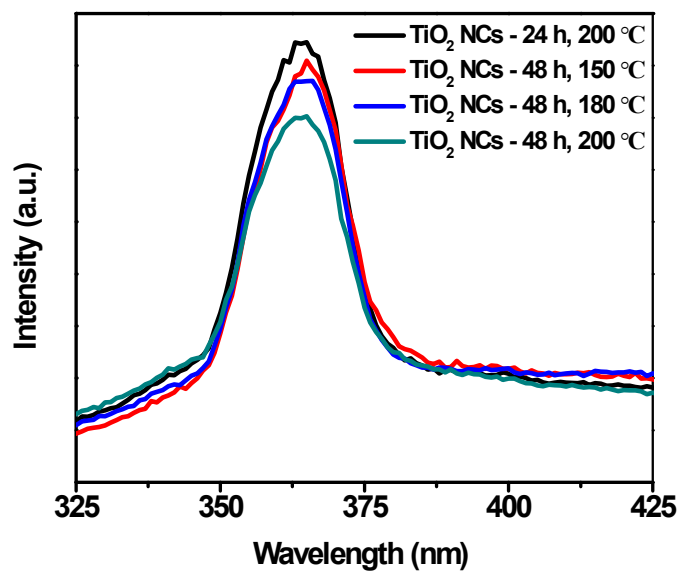

**Figure S3.** Photoluminescence spectra of TiO<sub>2</sub> nanocuboids prepared under different reaction time and temperature conditions

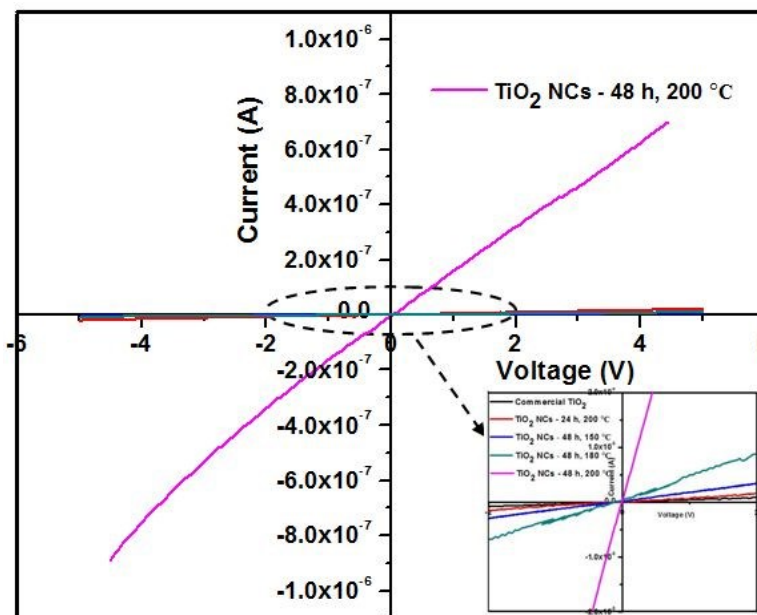

**Figure S4.** I-V plots of commercial TiO<sub>2</sub> and as prepared TiO<sub>2</sub> nanocuboids with illumination (1.5AM) of light.

**Table S1.** Specific surface area, pore volume and average pore size of commercial TiO<sub>2</sub> and as prepared TiO<sub>2</sub> nanocuboids

| <b>Sample</b>                      | <b>Specific surface area<br/>(m<sup>2</sup> g<sup>-1</sup>)</b> | <b>Pore volume<br/>(cm<sup>3</sup> g<sup>-1</sup>)</b> | <b>Average pore radius<br/>(nm)</b> |
|------------------------------------|-----------------------------------------------------------------|--------------------------------------------------------|-------------------------------------|
| Commercial TiO <sub>2</sub>        | 29.3                                                            | 0.038                                                  | 6.64                                |
| TiO <sub>2</sub> -NCs 24 h, 200 °C | 122.9                                                           | 0.459                                                  | 9.91                                |
| TiO <sub>2</sub> -NCs 48 h, 150 °C | 111.6                                                           | 0.346                                                  | 6.99                                |
| TiO <sub>2</sub> -NCs 48 h, 180 °C | 103.2                                                           | 0.402                                                  | 8.85                                |
| TiO <sub>2</sub> -NCs 48 h, 200 °C | 85.7                                                            | 0.495                                                  | 12.04                               |

**Table S2.** Comparison of the photocatalytic H<sub>2</sub> generation activity of anatase TiO<sub>2</sub> nanostructures reported by various researchers with as prepared anatase TiO<sub>2</sub> nanocuboids.

| Sr. No. | Photocatalyst                               | Amount (g) | Light Source | H <sub>2</sub> generation (μmol h <sup>-1</sup> g <sup>-1</sup> ) | Reference no. |
|---------|---------------------------------------------|------------|--------------|-------------------------------------------------------------------|---------------|
| 1       | TiO <sub>2</sub> nanocuboids                | 0.02       | 400W Hg lamp | 3866.44                                                           | This work     |
| 2       | TiO <sub>2</sub> (3D-flowerlike nanosheets) | 1          | 450W Hg lamp | 117.6                                                             | 1             |
| 3       | TiO <sub>2</sub> (nanosheets)               | 0.1        | 300W Xe lamp | 2036                                                              | 2             |
| 4       | TiO <sub>2</sub> (cube-like morphology )    | 0.05       | 300W Xe lamp | 104.54                                                            | 3             |
| 5       | TiO <sub>2</sub> (twinned nanocrystals)     | 0.05       | 300W Xe lamp | 1272.66                                                           | 3             |
| 6       | TiO <sub>2</sub> (mesoporous nanofibers)    | 0.1        | 300W Xe lamp | 231.7                                                             | 4             |
| 7       | TiO <sub>2</sub> (hollow spheres)           | 0.015      | 300W Xe lamp | 21.2                                                              | 5             |

**References:**

1. J. Jitputti, T. Rattanavoravipa, S. Chuangchote, S. Pavasupree, Y. Suzuki and S. Yoshikawa, Low temperature hydrothermal synthesis of monodispersed flower-like titanate nanosheets, *Catal. Commun.*, 2009, **10**, 378–382.
2. Y.-J. Yuan, Z.-J. Ye, H.-W. Lu, B. Hu, Y.-H. Li, D.-Q. Chen, J.-S. Zhong, Z.-T. Yu and Z.-G. Zou, Constructing Anatase TiO<sub>2</sub> Nanosheets with Exposed (001)

- Facets/Layered MoS<sub>2</sub> Two-Dimensional Nanojunction for Enhanced Solar Hydrogen Generation, *ACS Catal.* 2016, **6**, 532–554.
3. G. Cheng, Y. Wei, Ji. Xiong, Y. Gan, J. Zhu and F. Xu, Same titanium glycolate precursor but different products: successful synthesis of twinned anatase TiO<sub>2</sub> nanocrystals with excellent solar photocatalytic hydrogen evolution capability, *Inorg. Chem.Front.*, 2017, **4**, 1319–1329.
  4. H. Hou, M.-H. Shang, F. Gao, L. Wang, Q. Liu, J. Zheng, Z. Yang and W. Yang, Highly Efficient Photocatalytic Hydrogen Evolution in Ternary Hybrid TiO<sub>2</sub>/CuO/Cu Thoroughly Mesoporous Nanofibers, *ACS Appl. Mater. Interfaces*, 2016, **8**, 20128-20137.
  5. L. Li, S. Bai, W. Yin, S. Li, Y. Zhang and Z. Li, A novel etching and reconstruction route to ultrathin porous TiO<sub>2</sub> hollow spheres for enhanced photocatalytic hydrogen evolution, *Int. J. Hydrogen Energ.* 2016, **41**, 1627-1634.
